# Supplementary material for: Nitrogen-doped CeOxnanoparticles modified graphitic carbon nitride for enhanced photocatalytic hydrogen production
Source: Royal Society of Chemistry journal article supplement (doi:10.1039/c4gc01683a), 2014-09-18
Supplement: c4gc01683a1.pdf [file c4gc01683a1.pdf]

Electronic Supplementary Information (ESI) for

**Nitrogen-doped CeO<sub>x</sub> Nanoparticles Modified Graphitic  
Carbon Nitride for Enhanced Photocatalytic Hydrogen  
Production**

Jie Chen, Shaohua Shen\*, Po Wu, Liejin Guo\*

*International Research Center for Renewable Energy, State Key Laboratory of  
Multiphase Flow in Power Engineering, Xian Jiaotong University, 28 Xianning West  
Road, Xi'an, Shaanxi 710049, China.*

E-mail: shshen\_xjtu@mail.xjtu.edu.cn (S. Shen), lj-guo@mail.xjtu.edu.cn (L. Guo)

## Computational Methods

Based on first-principles density functional theory (DFT), calculations were performed using the ultrasoft pseudopotentials, together with the Perdew-Burke-Ernzerhof (PBE) exchange-correlation functional, implemented by CASTEP code. The electron wave function was expanded in plane waves up to a cutoff energy of 240 eV, and a medium (3×3×4) k-point was used for geometry optimization and following electronic structure calculations. The energy band tolerance is  $1.0 \times 10^{-5}$  eV.

## Decay Kinetics Calculation Methods

In the present study, the value of the goodness-of-fit parameter ( $\chi^2$ ) calculated from the tri-exponential decay kinetics method<sup>1,2</sup> is much closer to 1, which indicates a good fit of the data.<sup>3</sup> Thus, the emission signals were analyzed by the tri-exponential decay kinetics method rather than other (mono-, bi-, or tetra-exponential) kinetics method. Equation (1) and Equation (2)<sup>3</sup> were applied to carry out the tri-exponential kinetic analysis and to calculate average lifetime  $\tau_{avg}$ , respectively.

$$y = \sum A_i e^{-\left(\frac{t}{\tau_i}\right)} \quad (1)$$

$$\tau_{avg} = \frac{\sum A_i \tau_i^2}{\sum A_i \tau_i} \quad (2)$$

Table S1 The weight contents for all the elements (C, N, O, Ce) in g-C<sub>3</sub>N<sub>4</sub> and Ce-CN-V photocatalysts.

| Samples                         | C (wt%) | N (wt%) | O (wt%) | Ce (wt%) |
|---------------------------------|---------|---------|---------|----------|
| g-C <sub>3</sub> N <sub>4</sub> | 37.78   | 60.67   | 1.55    | 0.00     |
| Ce-CN-1                         | 37.29   | 60.04   | 1.72    | 0.95     |
| Ce-CN-3                         | 37.33   | 58.16   | 2.06    | 2.45     |
| Ce-CN-5                         | 36.42   | 56.91   | 2.45    | 4.22     |
| Ce-CN-7                         | 35.71   | 55.43   | 2.88    | 5.88     |
| Ce-CN-10                        | 34.36   | 53.67   | 3.45    | 8.52     |
| Ce-CN-15                        | 32.35   | 50.35   | 4.48    | 12.82    |

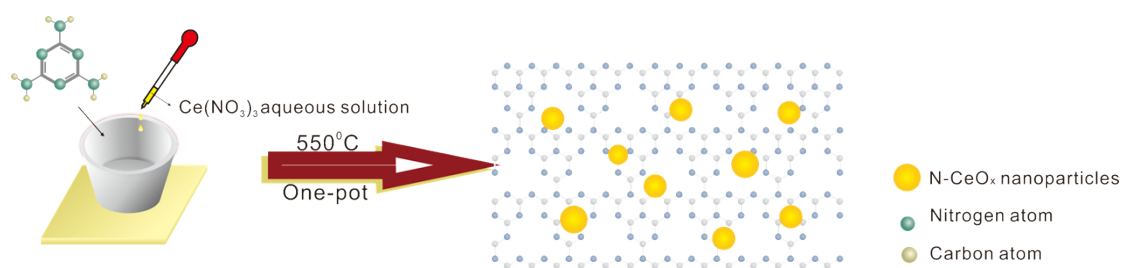

**Fig. S1** Schematic illustration of the fabrication of the Ce-CN-V composite photocatalysts.

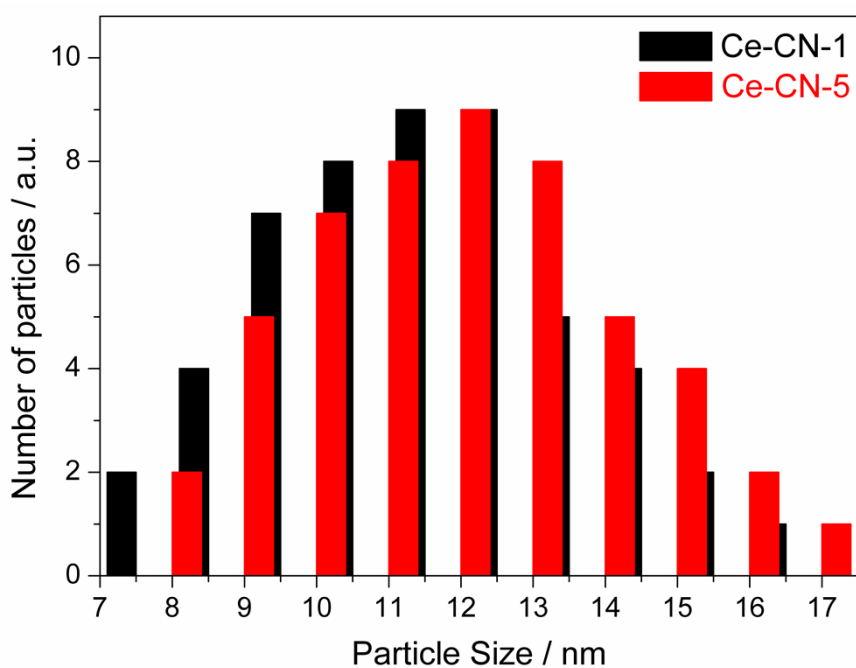

**Fig. S2** The particle size distribution for Ce-CN-1 and Ce-CN-5 recorded by measuring more than 100 nanoparticles from the TEM images of the corresponding samples.

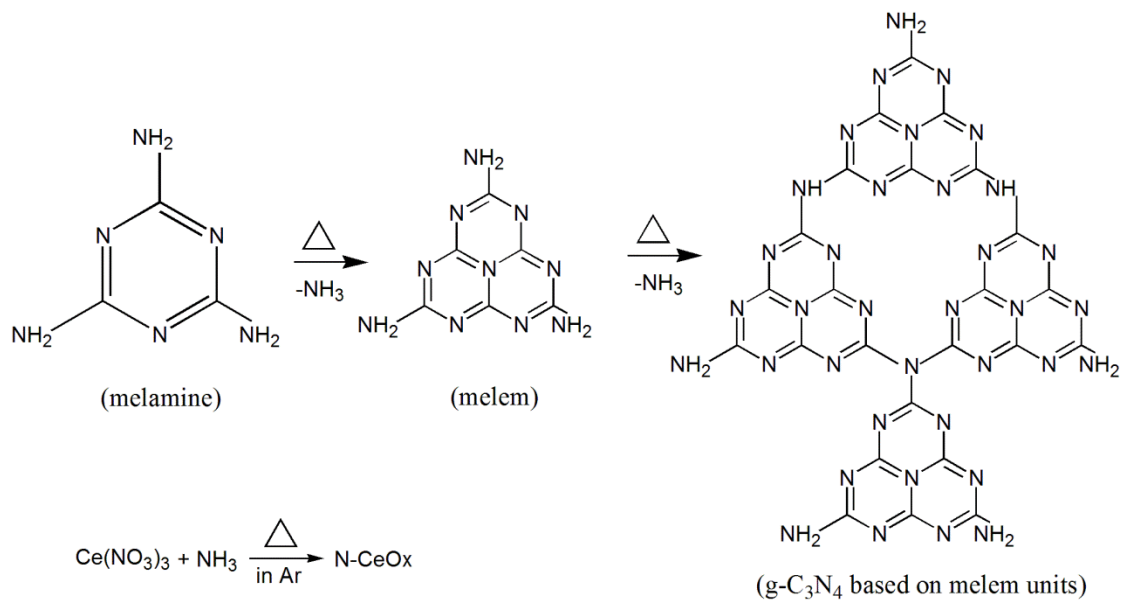

Fig. S3 The schematic illustration of the proposed formation process of N-CeO<sub>x</sub> NPs on g-C<sub>3</sub>N<sub>4</sub>.

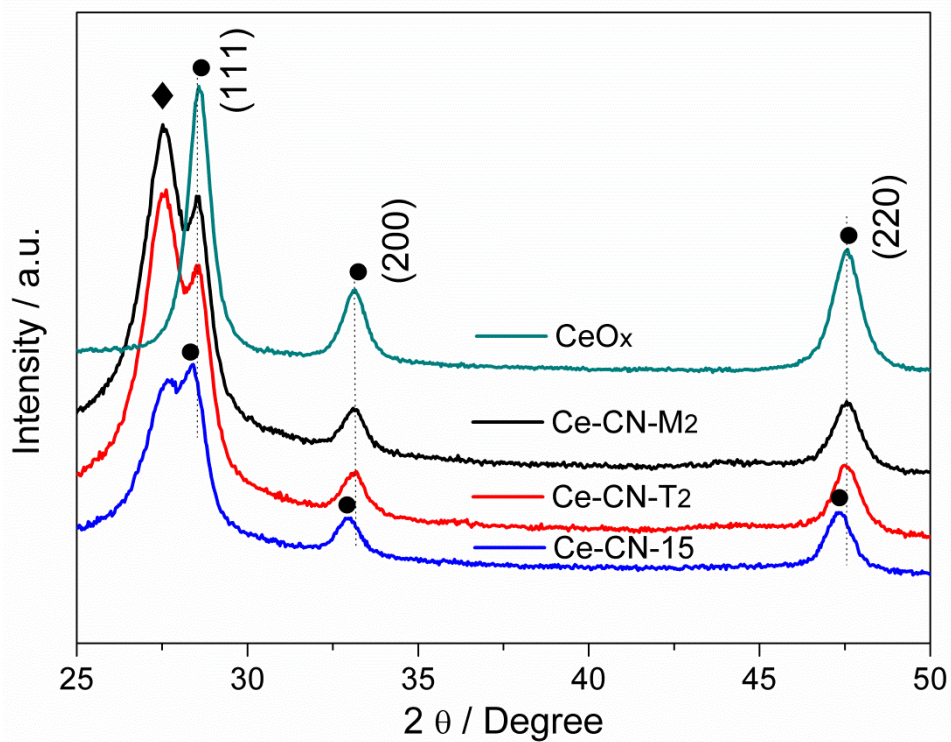

Fig. S4 The XRD patterns of Ce-CN-15, CeO<sub>x</sub> and Ce-CN-M<sub>2</sub> and Ce-CN-T<sub>2</sub> photocatalysts.

As shown in Fig. S5, the increasing intensity of Ce 3d peaks should be due to the increased amount of Ce in Ce-CN-V photocatalysts. The XPS peaks of Ce 3d were undetectable for Ce-CN-V (V = 1, 3), possibly because of the detection limit of XPS instrument.

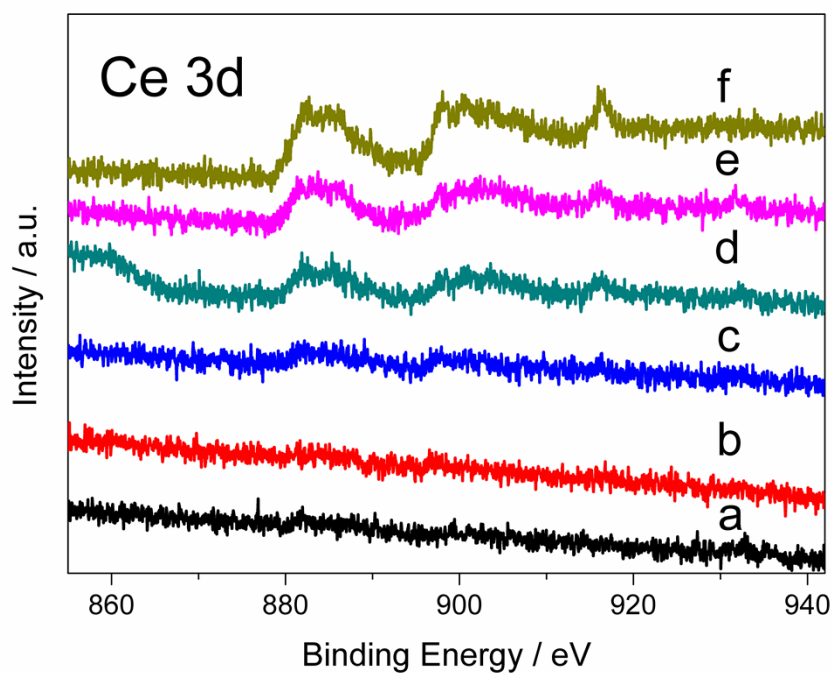

**Fig. S5** Ce 3d XPS spectra of the Ce-CN-V photocatalysts prepared with V mL of 0.031 g/mL  $\text{Ce}(\text{NO}_3)_3 \cdot 6\text{H}_2\text{O}$  aqueous solution: (a) V = 1, (b) V = 3, (c) V = 5, (d) V = 7, (e) V = 10, (f) V = 15.

To further confirm the influence of N-doping on the electronic structure of  $\text{CeO}_x$ , DFT calculation<sup>4</sup> was carried out to demonstrate the narrowed band structure of  $\text{CeO}_x$  induced by nitrogen incorporation. As shown in Fig. S6, it was unambiguous to assign the absorption band of  $\text{CeO}_x$  to the transition from O 2p orbital (VB) to Ce 4f orbital (CB) as demonstrated from the calculated electronic band structures.<sup>5,6</sup> Compared to  $\text{CeO}_x$ , N- $\text{CeO}_x$  has VB edge leveled up by 0.21 eV, due to the N-dopants introduced energy levels above the O 2p level,<sup>7-9</sup> while the CB edge was significantly lowered by 0.31 eV, thus resulting in the decreased bandgap energy.

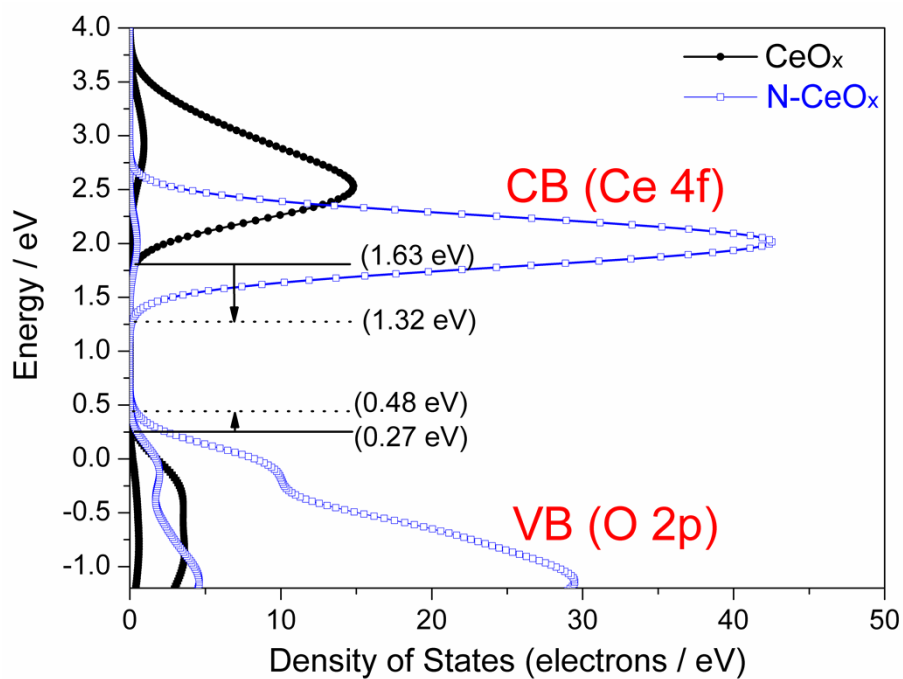

**Fig. S6** DFT calculations of the densities of states of  $\text{CeO}_x$  and N- $\text{CeO}_x$ . Solid line and dotted line represent the band positions for  $\text{CeO}_x$  and N- $\text{CeO}_x$ , respectively. CB: conduction band, VB: valence band.

As demonstrated from Fig. S7, the visible light absorption of Ce-CN-T and  $\text{CeO}_x$  was much weaker than that of Ce-CN-5, especially in the range of  $\lambda > 500$  nm. This should be attributed to that nitrogen was not introduced into the lattice of  $\text{CeO}_x$  by the two-step method and the visible light absorption ability of  $\text{CeO}_x$  in Ce-CN-T was weaker than the N- $\text{CeO}_x$  in Ce-CN-5.

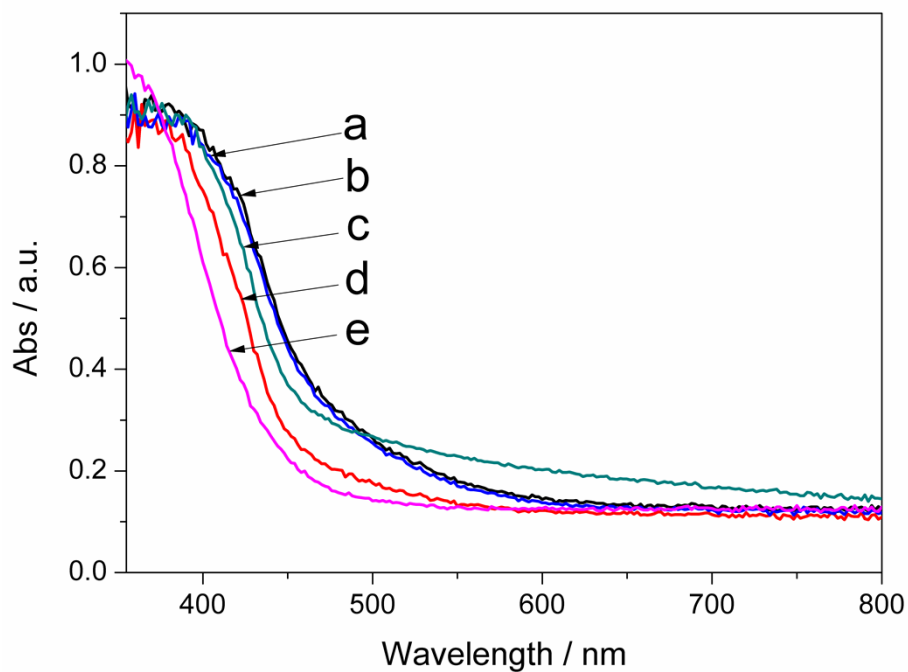

**Fig. S7** UV-vis diffuse reflectance spectra of (a) pure  $\text{g-C}_3\text{N}_4$ , (b) Ce-CN-M, (c) Ce-CN-5, (d) Ce-CN-T, and (e) pure  $\text{CeO}_x$  photocatalysts.

As shown from Fig. S8, the N-CeO<sub>x</sub> or CeO<sub>x</sub> with different morphology and size were formed on the surface of g-C<sub>3</sub>N<sub>4</sub> with different methods. As for Ce-CN-5 prepared by one-pot method, the N-CeO<sub>x</sub> nanoparticles (NPs) are very small with a size range of 7-17 nm as shown in Fig. S8A, B. While for the Ce-CN-T prepared by the two-step method, the size of CeO<sub>x</sub> turned out to be 40-50 nm (Fig. S8C,D), which was much larger than the N-CeO<sub>x</sub> NPs in Ce-CN-5. Therefore, it can be deduced that the contact area of N-CeO<sub>x</sub>/g-C<sub>3</sub>N<sub>4</sub> heterojunction in Ce-CN-5 will be much larger than that of CeO<sub>x</sub>/g-C<sub>3</sub>N<sub>4</sub> heterojunction in Ce-CN-T, leading to more efficient charge carriers transfer between N-CeO<sub>x</sub> and g-C<sub>3</sub>N<sub>4</sub> in Ce-CN-5 than in Ce-CN-T. However, large CeO<sub>x</sub> bulks are found in the Ce-CN-M sample prepared by the simple mechanical method (Fig. S8E). Besides, some of the CeO<sub>x</sub> bulks are not in intense contact with the substrate g-C<sub>3</sub>N<sub>4</sub>, as shown from Fig. S8F, leading to bad formation of the CeO<sub>x</sub>/g-C<sub>3</sub>N<sub>4</sub> heterojunction and consequently poor charge carriers separation ability.

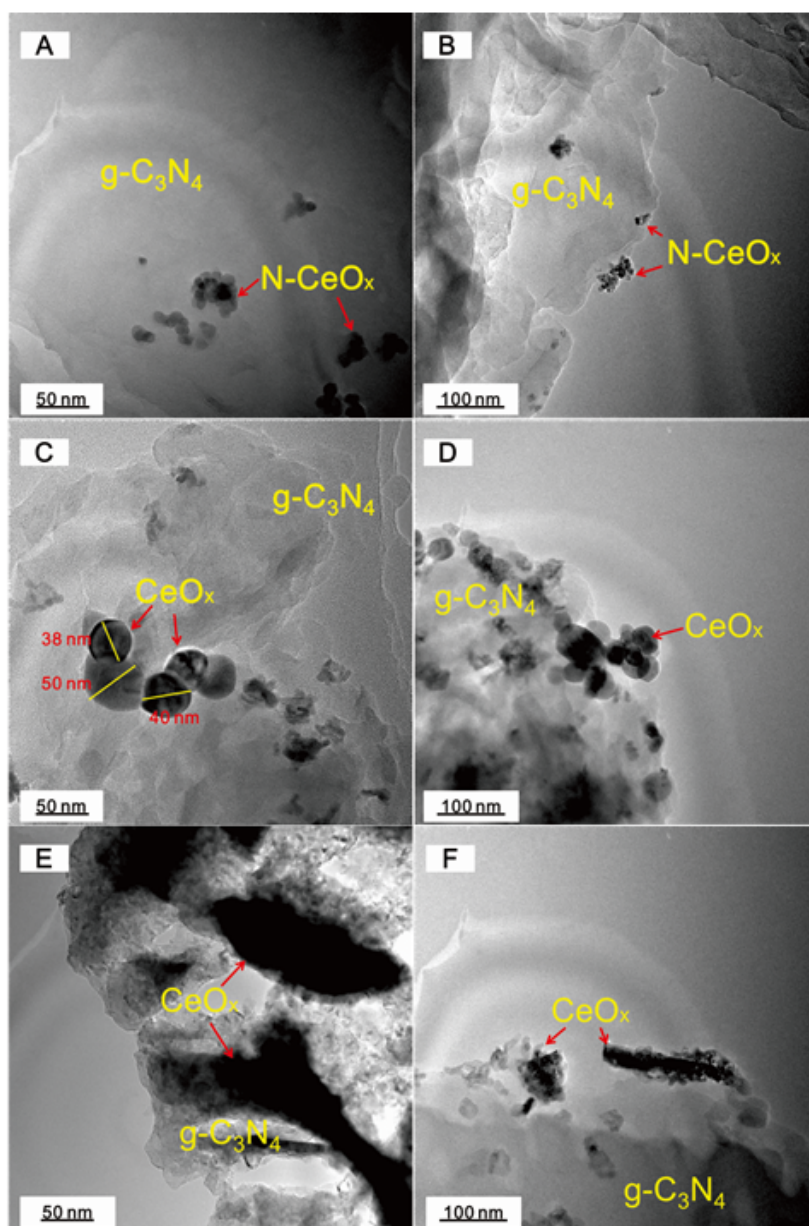

**Fig. S8** TEM images of the photocatalysts prepared by different methods. (A), (B): Ce-CN-5 prepared by one-pot method, (C), (D): Ce-CN-T prepared by two-step method, (E), (F): Ce-CN-M prepared by mechanical method.



To prove the existence and function of Pt nanoparticles as hydrogen evolution sites, TEM images for Pt loaded Ce-CN-5 after the photocatalytic hydrogen production reaction were taken, as shown in Fig. S9. Fig. S9A shows the Pt loaded g-C<sub>3</sub>N<sub>4</sub>, Pt NPs with an average size of ca. 10 nm were formed on the surface of g-C<sub>3</sub>N<sub>4</sub>, acting as the hydrogen evolution sites. The shape and size of the Pt NPs are very much alike the reported morphology in the reference <sup>10</sup>and our previous report<sup>11</sup>. While for Pt loaded Ce-CN-5 in Fig. S9B, the 50 nm N-CeO<sub>x</sub> NPs and 10 nm Pt NPs co-existed on g-C<sub>3</sub>N<sub>4</sub>.

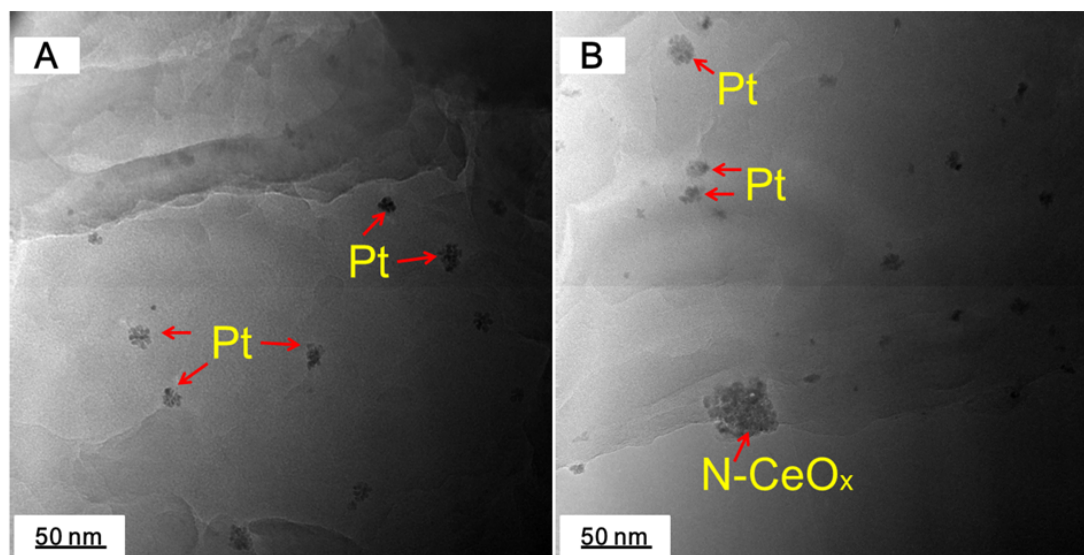

**Fig. S9** TEM images of Pt loaded (A) g-C<sub>3</sub>N<sub>4</sub> and (B) Ce-CN-5 after the photocatalytic hydrogen production reaction.

## References

- 1 P. Niu, L. Zhang, G. Liu, H. M. Cheng, *Adv. Fun. Mater.*, 2012, **22**, 4763-4770.
- 2 S. Barman, M. Sadhukhan, *J. Mater. Chem.*, 2012, **22**, 21832-21837.
- 3 J. R. Lakowicz, Principles of fluorescence spectroscopy, *Springer*, 2009.
- 4 F. Goubin, X. Rocquefelte, M. H. Whangbo, Y. Montardi, R. Brec, S. Jobic, *J. Chem. Mater.*, 2004, **16**, 662-669.
- 5 W. Li, S. Xie, M. Li, X. Ouyang, G. Cui, X. Lu, Y. Tong, *J. Mater. Chem. A.*, 2013, **1**, 4190-4193.
- 6 R. Li, C. Fu, C. Q. Li, S. Yin, Y. Zhang, T. Sato, *J. Ceram. Soc. Jpn.*, 2010, **118**, 555-557.
- 7 R. Asahi, T. Morikawa, T. Ohwaki, K. Aoki, Y. Taga, *Science*, 2001, **293**, 269.
- 8 V. D. Di, G. Pacchioni, A. Selloni, S. Livraghi, E. Giamello, *J. Phys. Chem. B.*, 2005, **109**, 11414-11419.
- 9 Z. S. Lin, A. Orlov, R. M. Lambert, M. C. Payne, *N J. Phys. Chem. B.*, 2005, **109**, 20948-20952.
- 10 B. Chai, T. Y. Peng, J. Mao, K. Li, L. Zan. *Phys. Chem. Chem. Phys.*, 2012, **14**, 16745-16752.
- 11 J. Chen, S. Shen, P. Guo, P. Wu, L. Guo, *J. Mater. Chem. A.*, 2014, **2**, 4605-4612.
